# Supplementary material for: PRIMEtime: an epidemiological model for informing diet and obesity policy
Source: bioRxiv or medRxiv preprint supplement (doi:10.1101/2022.05.18.22275284), 2023-10-03
Supplement: Supplementary file [file media-1.pdf]

## Text S1 – PRIMETIME data inputs

|                                                                  |    |
|------------------------------------------------------------------|----|
| 1. Population numbers .....                                      | 2  |
| 2. All-cause mortality rates .....                               | 3  |
| 3. Background trends in overweight and obesity .....             | 4  |
| 4. Disease incidence rates.....                                  | 5  |
| 5. Disease case fatality rates.....                              | 7  |
| 6. Disease prevalence .....                                      | 9  |
| 7. Background trends in disease incidence and case fatality..... | 11 |
| 8. Relative risks of disease .....                               | 13 |
| 9. Utility weights .....                                         | 15 |
| 10. Disease costs.....                                           | 16 |

## 1. Population numbers

Table S1 UK population by age and sex from the Human Mortality Database[1] (all ages in 2015) and population projections from the Office for National Statistics[2] (future 0-4 year olds)

| Age group (years) | Intervention analyses |           |           | Model validation |           |           |
|-------------------|-----------------------|-----------|-----------|------------------|-----------|-----------|
|                   | Year0*                | Male      | Female    | Year0*           | Male      | Female    |
| 0-4               | 2050                  | 2,088,536 | 1,990,411 | –                | –         | –         |
| 0-4               | 2045                  | 2,069,673 | 1,972,502 | –                | –         | –         |
| 0-4               | 2040                  | 1,999,663 | 1,905,857 | –                | –         | –         |
| 0-4               | 2035                  | 1,953,494 | 1,861,924 | –                | –         | –         |
| 0-4               | 2030                  | 1,968,036 | 1,875,882 | 2020             | 2,006,190 | 1,910,568 |
| 0-4               | 2025                  | 1,994,735 | 1,901,451 | 2015             | 2,063,050 | 1,963,632 |
| 0-4               | 2020                  | 2,006,190 | 1,910,568 | 2010             | 1,960,543 | 1,871,193 |
| 0-4               | 2015                  | 2,063,050 | 1,963,632 | 2005             | 1,755,352 | 1,669,413 |
| 5-9               | 2015                  | 1,999,632 | 1,907,222 | 2005             | 1,860,676 | 1,771,490 |
| 10-14             | 2015                  | 1,809,767 | 1,725,856 | 2005             | 1,979,193 | 1,886,300 |
| 15-19             | 2015                  | 1,970,469 | 1,866,308 | 2005             | 1,973,931 | 1,911,380 |
| 20-24             | 2015                  | 2,191,121 | 2,113,257 | 2005             | 1,953,411 | 1,936,362 |
| 25-29             | 2015                  | 2,213,208 | 2,203,621 | 2005             | 1,879,089 | 1,892,516 |
| 30-34             | 2015                  | 2,171,167 | 2,197,785 | 2005             | 2,109,298 | 2,139,208 |
| 35-39             | 2015                  | 2,009,195 | 2,027,365 | 2005             | 2,314,153 | 2,352,797 |
| 40-44             | 2015                  | 2,149,871 | 2,195,049 | 2005             | 2,256,961 | 2,304,185 |
| 45-49             | 2015                  | 2,292,536 | 2,359,142 | 2005             | 1,986,295 | 2,015,247 |
| 50-54             | 2015                  | 2,227,216 | 2,284,486 | 2005             | 1,824,379 | 1,859,121 |
| 55-59             | 2015                  | 1,924,116 | 1,972,675 | 2005             | 1,925,996 | 1,968,812 |
| 60-64             | 2015                  | 1,716,700 | 1,789,959 | 2005             | 1,505,366 | 1,568,625 |
| 65-69             | 2015                  | 1,742,943 | 1,845,273 | 2005             | 1,297,881 | 1,402,969 |
| 70-74             | 2015                  | 1,273,261 | 1,406,103 | 2005             | 1,075,857 | 1,257,363 |
| 75-79             | 2015                  | 985,818   | 1,165,295 | 2005             | 830,104   | 1,104,028 |
| 80-84             | 2015                  | 671,986   | 903,785   | 2005             | 561,950   | 927,136   |
| 85-89             | 2015                  | 366,304   | 604,483   | 2005             | 217,373   | 472,565   |
| 90-94             | 2015                  | 134,860   | 309,232   | 2005             | 78,864    | 240,969   |
| 95-100            | 2015                  | 22,305    | 82,158    | 2005             | 13,891    | 67,683    |

\* Year0 reflects the year in which future cohorts enter the PRIMETIME model simulation.

## 2. All-cause mortality rates

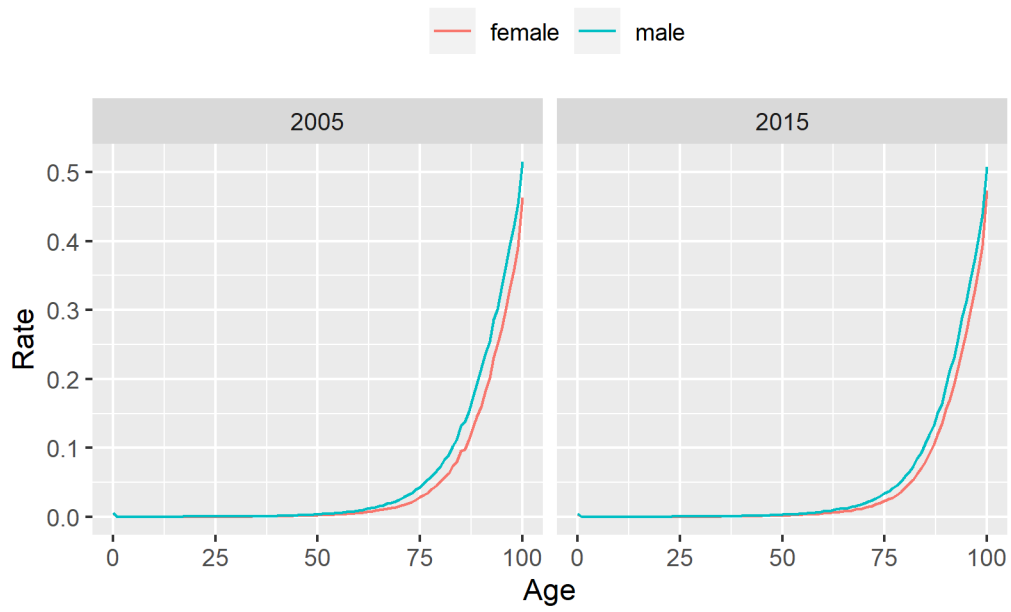

Figure S1 UK all-cause mortality from the Human Mortality Database[1] for 2005 (model validation) and 2015 (intervention analyses)

### 3. Background trends in overweight and obesity

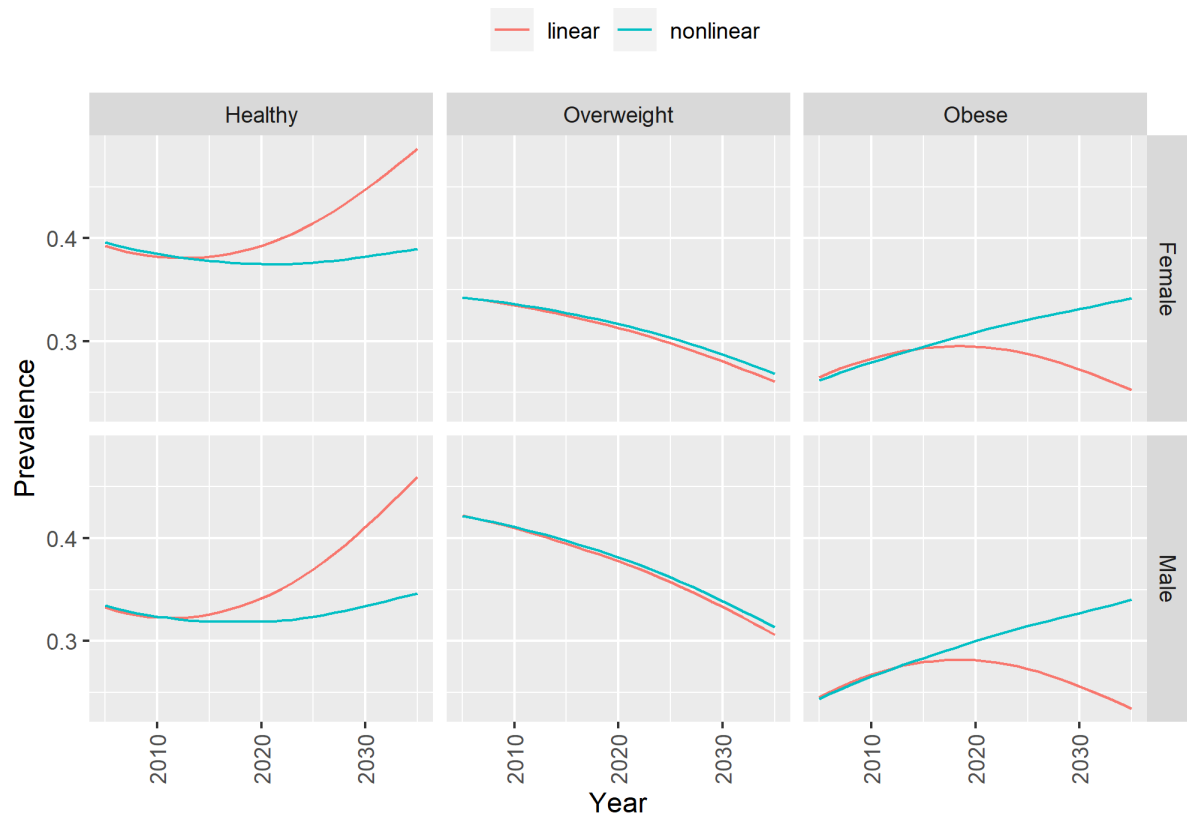

Figure S2 Predicted trends in overweight and obesity with non-linear (base case) and linear (sensitivity) models from Cobiac et al.[3]

#### 4. Disease incidence rates

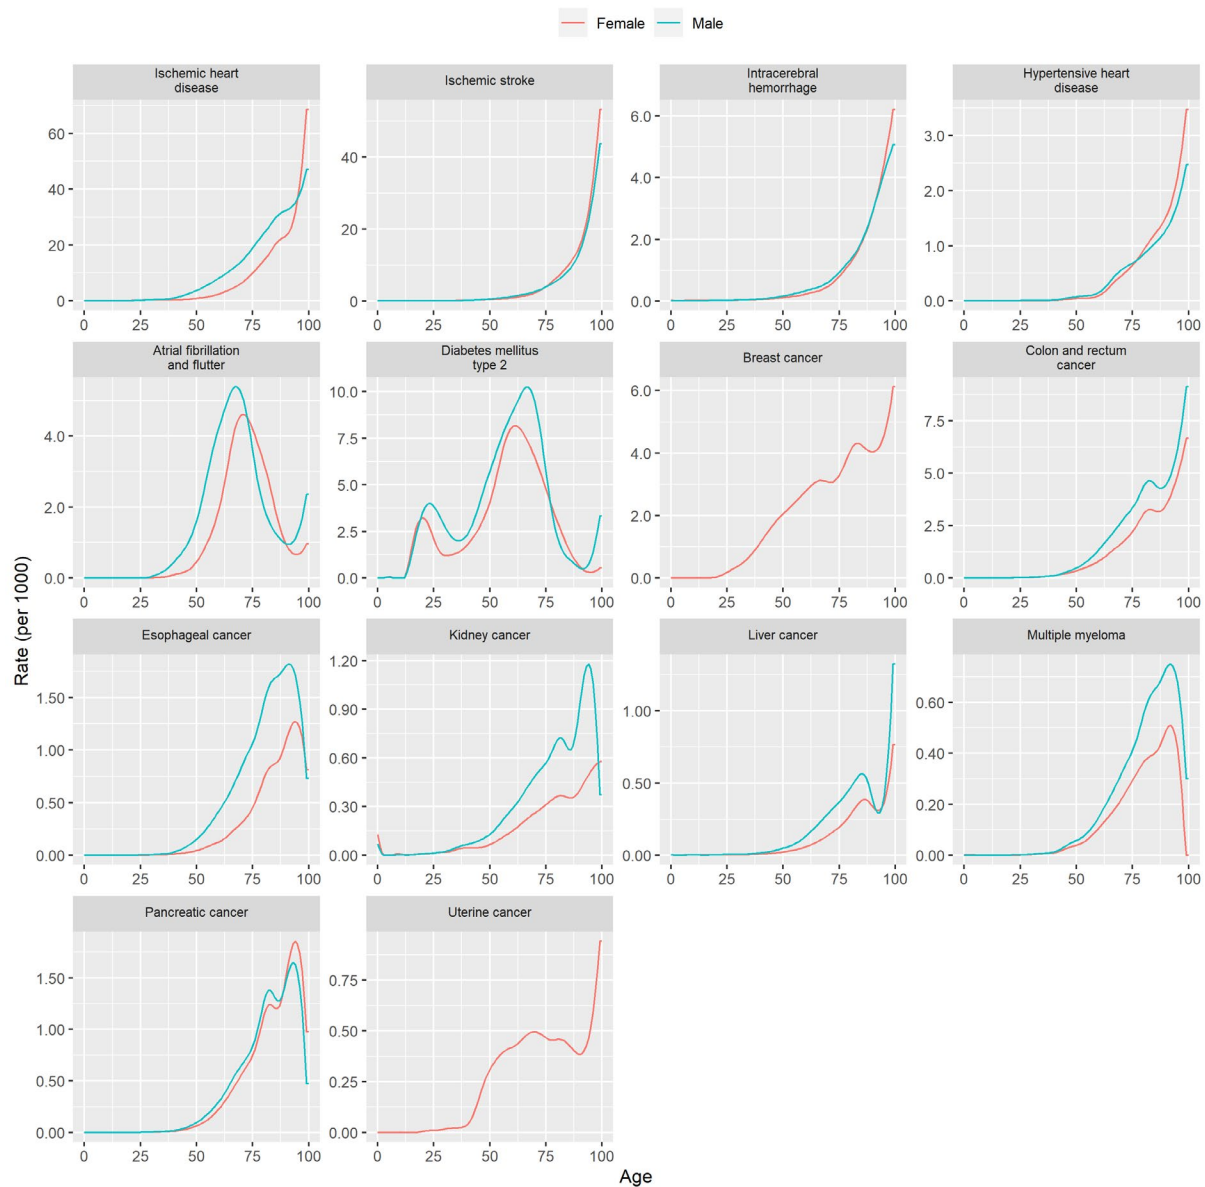

Figure S3 Incidence rates, derived from Global Burden of Disease[4] estimates using disbayes,[5] – 2005 (Note: graphs are presented on different scales to illustrate each disease in sufficient detail, but this does have the effect of exaggerating variability in rates for some diseases)

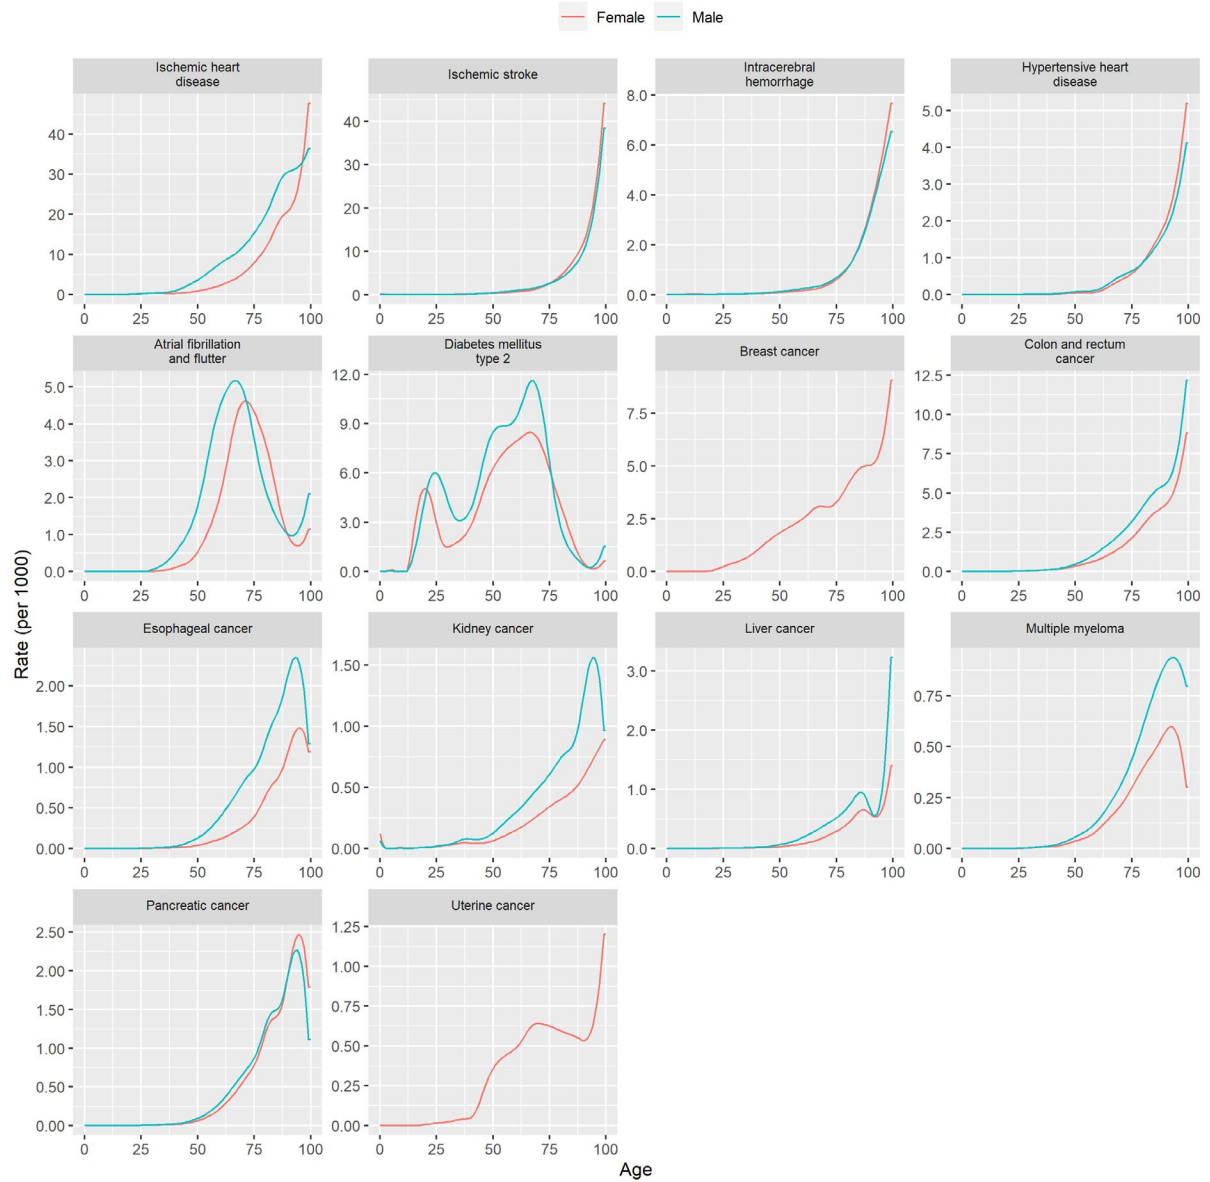

Figure S4 Incidence rates, derived from Global Burden of Disease[4] estimates using disbayes,[5] – 2015 (Note: graphs are presented on different scales to illustrate each disease in sufficient detail, but this does have the effect of exaggerating variability in rates for some diseases)

## 5. Disease case fatality rates

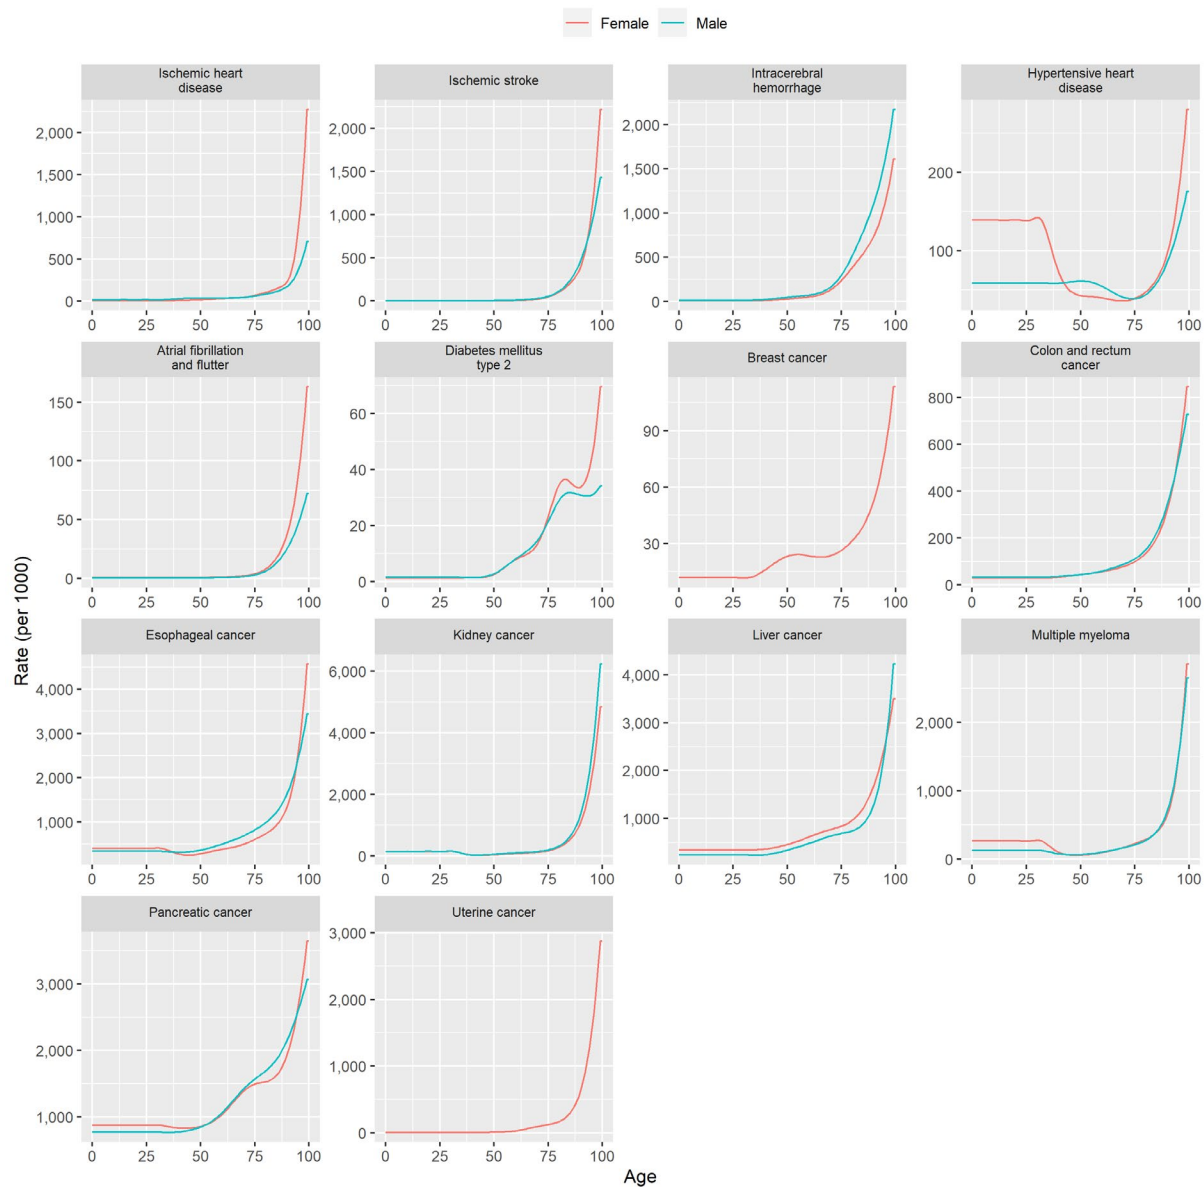

Figure S5 Case fatality rates, derived from Global Burden of Disease[4] estimates using disbayes,[5] – 2005 (Note: graphs are presented on different scales to illustrate each disease in sufficient detail, but this does have the effect of exaggerating variability in rates for some diseases)

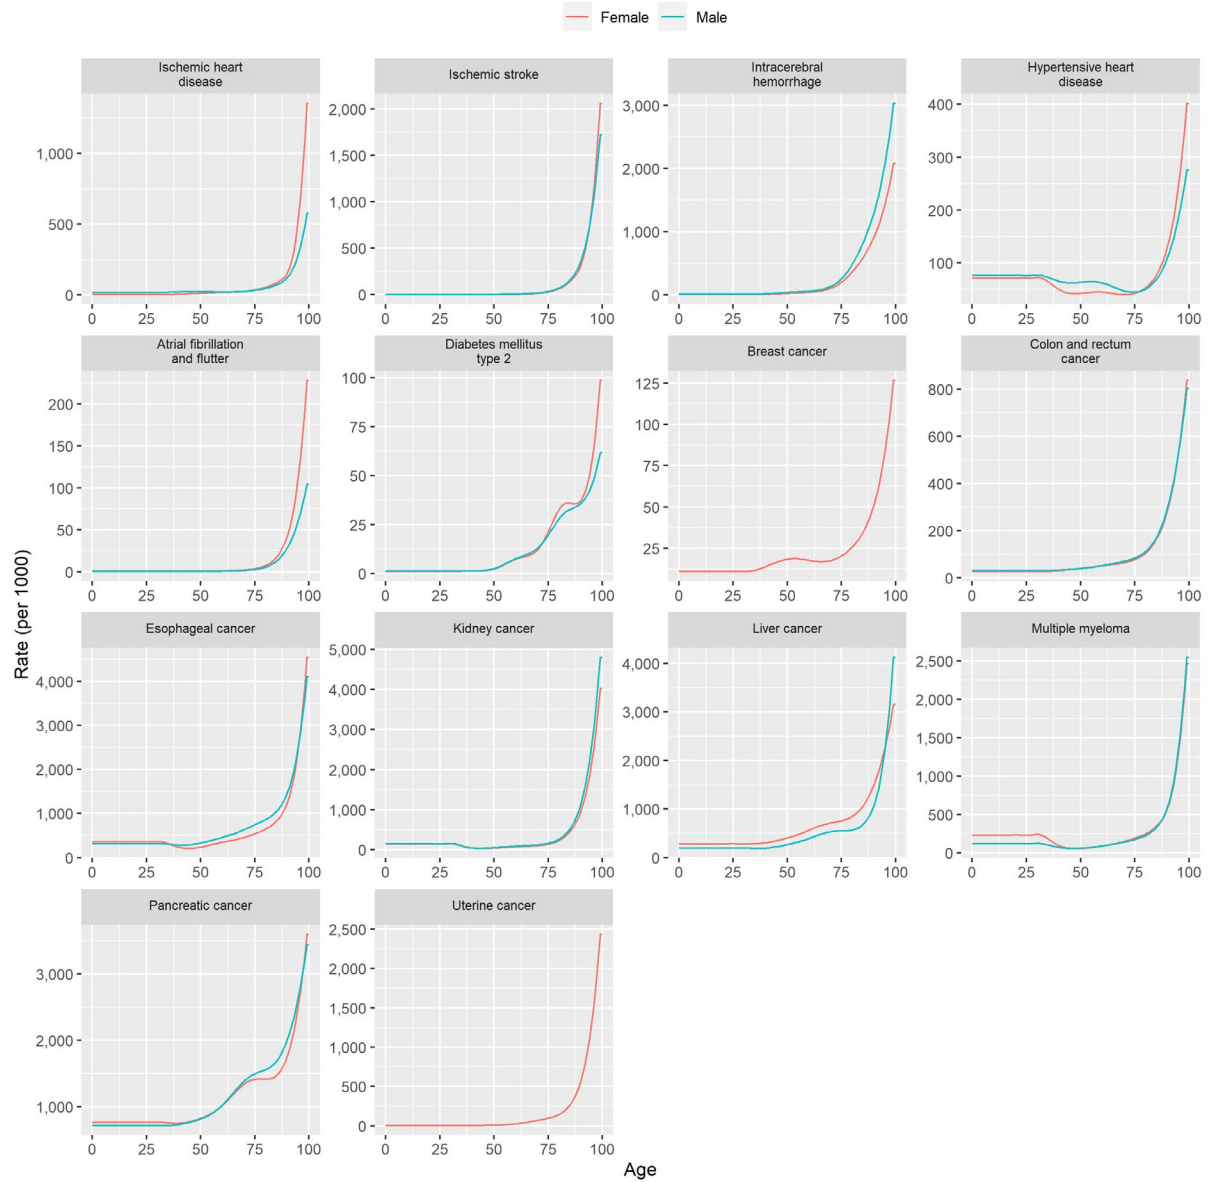

Figure S6 Case fatality rates, derived from Global Burden of Disease[4] estimates using disbayes,[5] – 2015 (Note: graphs are presented on different scales to illustrate each disease in sufficient detail, but this does have the effect of exaggerating variability in rates for some diseases)



## 6. Disease prevalence

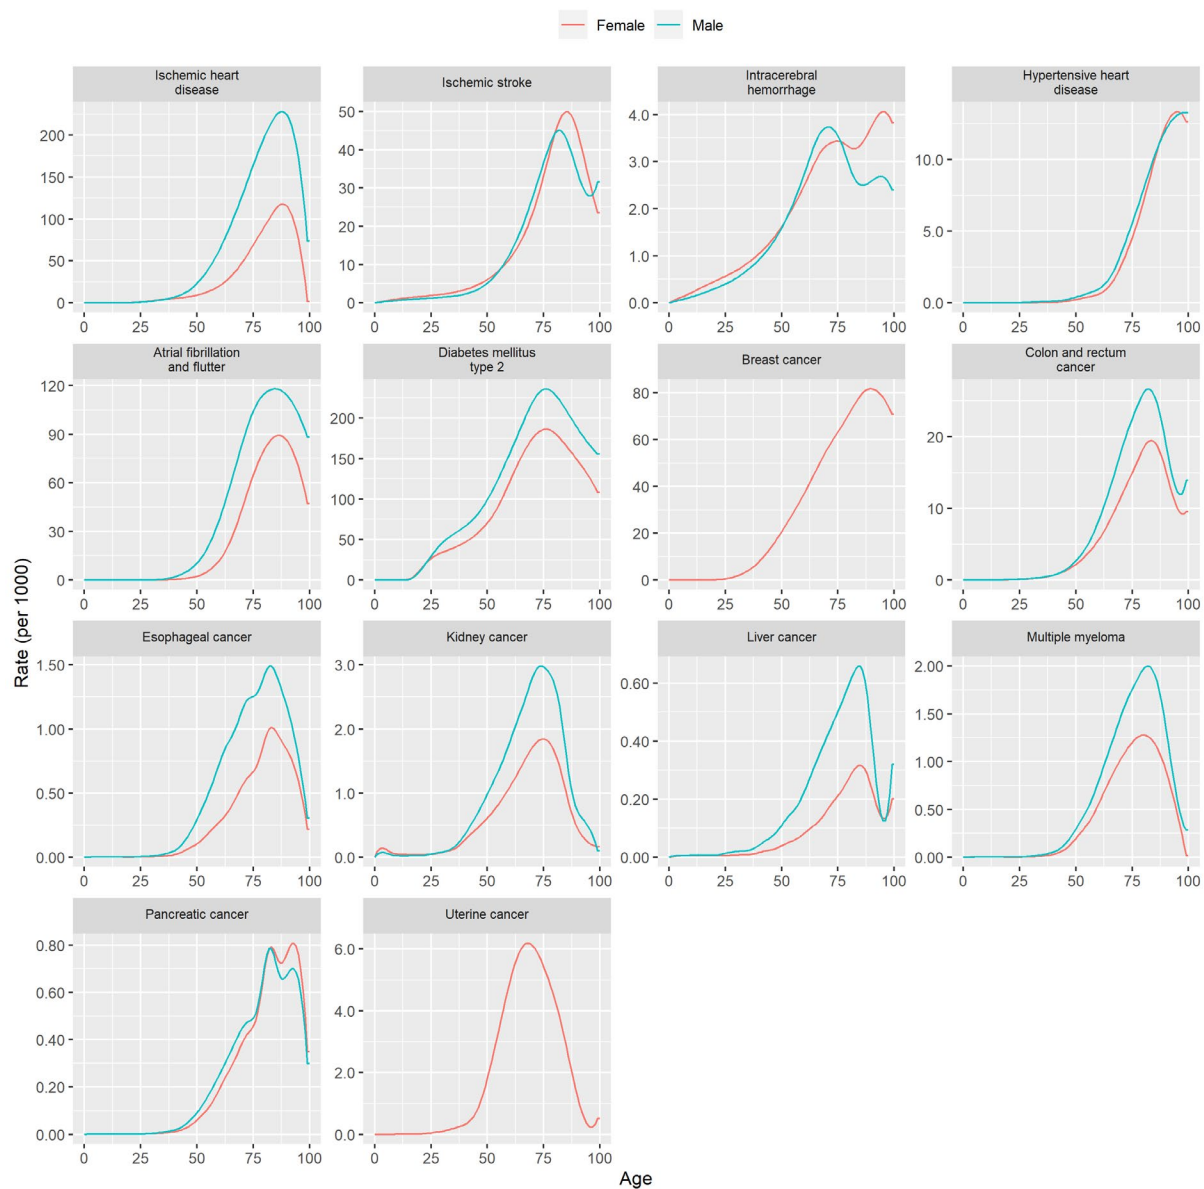

Figure S7 Starting prevalence rates, derived from Global Burden of Disease[4] estimates using disbayes,[5] – 2005 (Note: graphs are presented on different scales to illustrate each disease in sufficient detail, but this does have the effect of exaggerating variability in rates for some diseases)

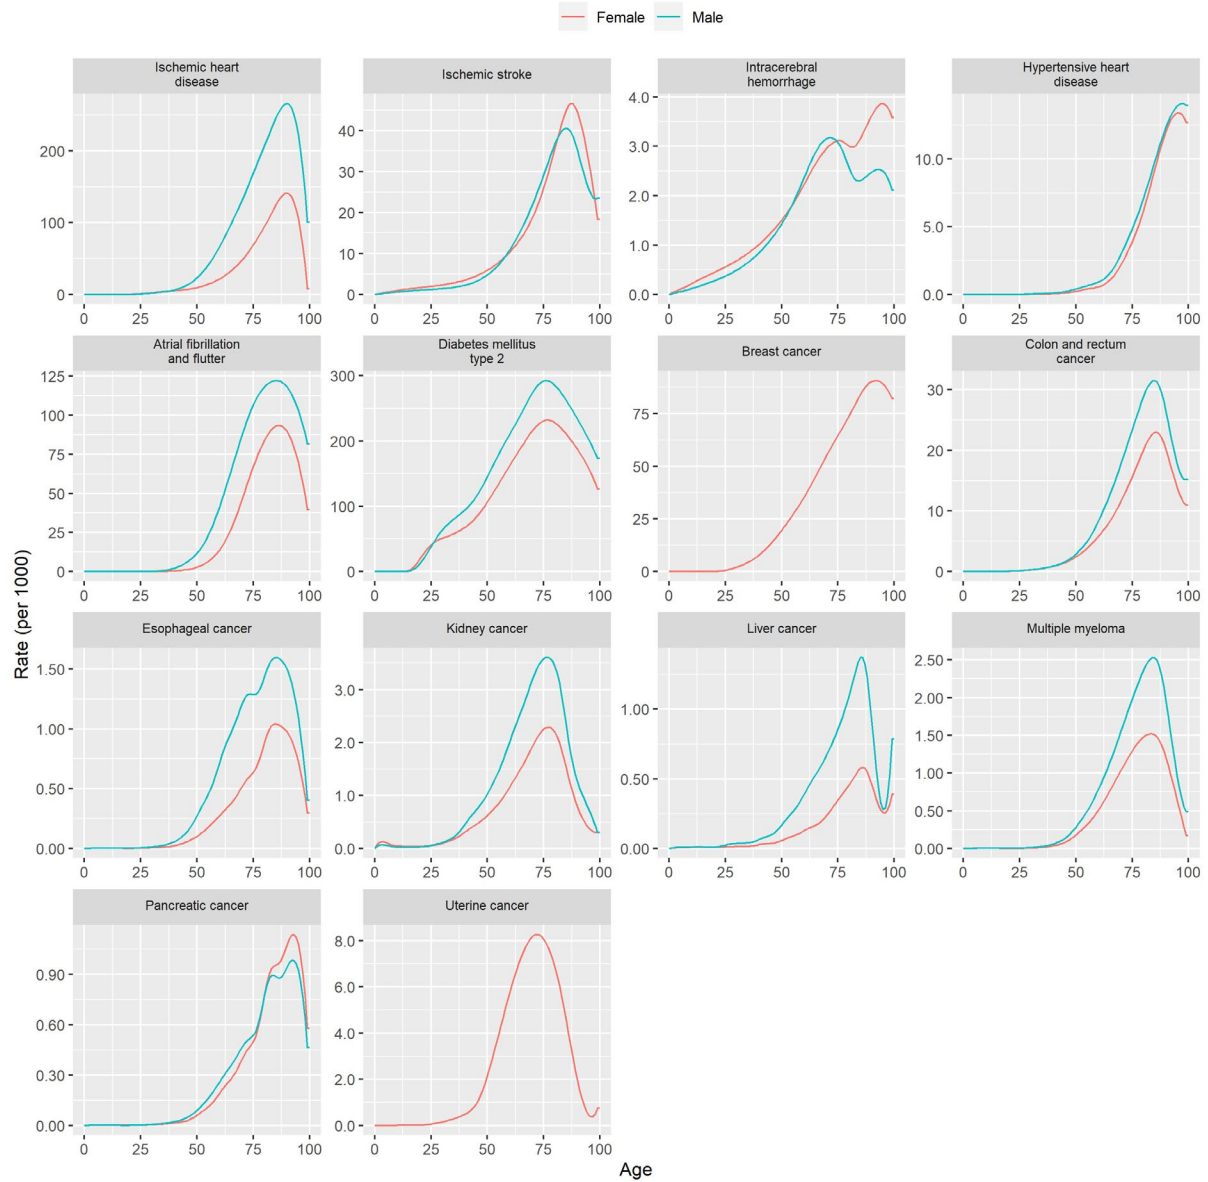

Figure S8 Starting prevalence rates, derived from Global Burden of Disease[4] estimates using disbayes,[5] – 2015 (Note: graphs are presented on different scales to illustrate each disease in sufficient detail, but this does have the effect of exaggerating variability in rates for some diseases)

## 7. Background trends in disease incidence and case fatality

Table S2 Annual trends in incidence rates, by sex and age group

| Cause                           | Female  |         |         | Male    |         |         |
|---------------------------------|---------|---------|---------|---------|---------|---------|
|                                 | 0-34    | 35-64   | 65+     | 0-34    | 35-64   | 65+     |
| <b>1995-2005</b>                |         |         |         |         |         |         |
| Ischaemic heart disease         | -0.0123 | -0.0256 | -0.0302 | -0.0223 | -0.0223 | -0.0284 |
| Ischaemic stroke                | -0.0083 | -0.0279 | -0.0300 | -0.0099 | -0.0248 | -0.0334 |
| Intracerebral haemorrhage       | -0.0080 | -0.0328 | -0.0074 | -0.0134 | -0.0231 | -0.0147 |
| Hypertensive heart disease      | 0.0514  | 0.0289  | 0.1270  | 0.0548  | 0.0757  | 0.1290  |
| Atrial fibrillation and flutter | -0.0043 | -0.0008 | -0.0050 | 0.0091  | -0.0010 | -0.0072 |
| Diabetes mellitus type 2        | 0.0945  | 0.0022  | 0.0144  | 0.0901  | 0.0022  | 0.0472  |
| Breast cancer                   | -0.0192 | -0.0065 | 0.0008  | NA      | NA      | NA      |
| Colon and rectum cancer         | 0.0063  | -0.0103 | -0.0059 | 0.0073  | -0.0080 | -0.0039 |
| Oesophageal cancer              | -0.0026 | -0.0013 | 0.0023  | -0.0014 | 0.0061  | 0.0085  |
| Kidney cancer                   | 0.0093  | 0.0025  | 0.0218  | 0.0178  | 0.0058  | 0.0140  |
| Liver cancer                    | 0.0231  | 0.0294  | 0.0419  | 0.0389  | 0.0371  | 0.0428  |
| Multiple myeloma                | 0.0123  | 0.0011  | 0.0074  | 0.0130  | 0.0036  | 0.0063  |
| Pancreatic cancer               | -0.0027 | -0.0006 | 0.0076  | -0.0025 | -0.0043 | 0.0006  |
| Uterine cancer                  | 0.0422  | 0.0292  | 0.0303  | NA      | NA      | NA      |
| <b>2005-2015</b>                |         |         |         |         |         |         |
| Ischaemic heart disease         | 0.0052  | 0.0013  | -0.0205 | -0.0030 | 0.0007  | -0.0156 |
| Ischaemic stroke                | 0.0033  | -0.0172 | -0.0320 | -0.0007 | -0.0180 | -0.0318 |
| Intracerebral haemorrhage       | -0.0051 | -0.0202 | -0.0041 | -0.0091 | -0.0203 | -0.0121 |
| Hypertensive heart disease      | 0.0185  | -0.0027 | 0.0034  | 0.0086  | 0.0028  | 0.0037  |
| Atrial fibrillation and flutter | 0.0069  | 0.0142  | 0.0023  | 0.0069  | 0.0120  | -0.0019 |
| Diabetes mellitus type 2        | 0.0379  | 0.0261  | 0.0220  | 0.0376  | 0.0303  | 0.0131  |
| Breast cancer                   | 0.0112  | -0.0073 | 0.0042  | NA      | NA      | NA      |
| Colon and rectum cancer         | 0.0359  | 0.0013  | 0.0008  | 0.0295  | 0.0003  | -0.0021 |
| Oesophageal cancer              | 0.0105  | -0.0066 | -0.0078 | 0.0166  | -0.0046 | -0.0028 |
| Kidney cancer                   | 0.0147  | 0.0015  | 0.0136  | 0.0214  | 0.0057  | 0.0093  |
| Liver cancer                    | 0.0291  | 0.0372  | 0.0418  | 0.0359  | 0.0372  | 0.0398  |
| Multiple myeloma                | 0.0020  | -0.0056 | 0.0056  | 0.0028  | 0.0009  | 0.0079  |
| Pancreatic cancer               | 0.0102  | 0.0024  | 0.0076  | 0.0126  | 0.0030  | 0.0068  |
| Uterine cancer                  | 0.0395  | 0.0209  | 0.0269  | NA      | NA      | NA      |

Table S3 Annual trends in case fatality rates, by sex and age group

| Cause                           | Female  |         |         | Male    |         |         |
|---------------------------------|---------|---------|---------|---------|---------|---------|
|                                 | 0-34    | 35-64   | 65+     | 0-34    | 35-64   | 65+     |
| <b>1995-2005</b>                |         |         |         |         |         |         |
| Ischaemic heart disease         | -0.0403 | -0.0433 | -0.0498 | -0.0179 | -0.0340 | -0.0491 |
| Ischaemic stroke                | -0.0335 | -0.0489 | -0.0085 | -0.0362 | -0.0505 | -0.0248 |
| Intracerebral haemorrhage       | -0.0328 | -0.0284 | 0.0013  | -0.0164 | -0.0173 | -0.0020 |
| Hypertensive heart disease      | 0.2510  | 0.1150  | -0.1930 | 0.0831  | 0.0732  | -0.0849 |
| Atrial fibrillation and flutter | -0.0072 | -0.0059 | 0.0147  | 0.0285  | 0.0066  | 0.0102  |
| Diabetes mellitus type 2        | -0.0147 | -0.0156 | -0.0138 | -0.0128 | -0.0181 | -0.0183 |
| Breast cancer                   | -0.0238 | -0.0256 | -0.0141 | NA      | NA      | NA      |
| Colon and rectum cancer         | -0.0162 | -0.0207 | -0.0163 | -0.0184 | -0.0228 | -0.0215 |
| Oesophageal cancer              | -0.0189 | -0.0151 | -0.0105 | -0.0154 | -0.0112 | -0.0097 |
| Kidney cancer                   | -0.0030 | -0.0165 | -0.0167 | -0.0016 | -0.0223 | -0.0196 |
| Liver cancer                    | -0.0238 | -0.0178 | -0.0140 | -0.0243 | -0.0240 | -0.0206 |
| Multiple myeloma                | -0.0239 | -0.0265 | -0.0160 | -0.0290 | -0.0296 | -0.0216 |
| Pancreatic cancer               | -0.0082 | -0.0058 | -0.0036 | -0.0056 | -0.0037 | -0.0023 |
| Uterine cancer                  | 0.0269  | -0.0130 | -0.0059 | NA      | NA      | NA      |
| <b>2005-2015</b>                |         |         |         |         |         |         |
| Ischaemic heart disease         | -0.0023 | -0.0348 | -0.0503 | 0.0127  | -0.0325 | -0.0467 |
| Ischaemic stroke                | -0.0647 | -0.0424 | -0.0292 | -0.0547 | -0.0320 | -0.0285 |
| Intracerebral haemorrhage       | -0.0234 | -0.0178 | -0.0055 | -0.0142 | -0.0137 | -0.0052 |
| Hypertensive heart disease      | -0.0668 | -0.0200 | 0.0170  | 0.0257  | 0.0088  | 0.0184  |
| Atrial fibrillation and flutter | 0.0091  | -0.0061 | 0.0098  | -0.0174 | -0.0126 | 0.0081  |
| Diabetes mellitus type 2        | -0.0084 | -0.0017 | -0.0048 | -0.0122 | -0.0013 | -0.0038 |
| Breast cancer                   | -0.0055 | -0.0198 | -0.0182 | NA      | NA      | NA      |
| Colon and rectum cancer         | -0.0112 | -0.0094 | -0.0186 | -0.0108 | -0.0117 | -0.0206 |
| Oesophageal cancer              | -0.0117 | -0.0140 | -0.0104 | -0.0058 | -0.0084 | -0.0094 |
| Kidney cancer                   | -0.0060 | -0.0086 | -0.0175 | -0.0046 | -0.0096 | -0.0134 |
| Liver cancer                    | -0.0206 | -0.0110 | -0.0099 | -0.0218 | -0.0201 | -0.0195 |
| Multiple myeloma                | -0.0132 | -0.0078 | -0.0129 | -0.0041 | -0.0083 | -0.0144 |
| Pancreatic cancer               | -0.0133 | -0.0054 | -0.0061 | -0.0068 | -0.0039 | -0.0047 |
| Uterine cancer                  | -0.0197 | -0.0096 | -0.0163 | NA      | NA      | NA      |

## 8. Relative risks of disease

Table S4 Relative risks of modelled obesity-related diseases

| Disease                    | Population subgroup | Units/Category          | Mean relative risk (95% CI) | Source              |
|----------------------------|---------------------|-------------------------|-----------------------------|---------------------|
| Ischaemic heart disease    | 35-44               | per 5kg/m <sup>32</sup> | 1.66 (1.51 to 1.84)         | Singh et al 2013[6] |
|                            | 45-54               | per 5kg/m <sup>31</sup> | 1.55 (1.46 to 1.64)         |                     |
|                            | 55-64               | per 5kg/m <sup>30</sup> | 1.44 (1.4 to 1.48)          |                     |
|                            | 65-74               | per 5kg/m <sup>29</sup> | 1.35 (1.32 to 1.38)         |                     |
|                            | 75-84               | per 5kg/m <sup>28</sup> | 1.26 (1.2 to 1.32)          |                     |
|                            | 85+                 | per 5kg/m <sup>27</sup> | 1.14 (1.04 to 1.26)         |                     |
| Ischaemic stroke           | 35-44               | per 5kg/m <sup>26</sup> | 1.86 (1.67 to 2.08)         | Singh et al 2013[6] |
|                            | 45-54               | per 5kg/m <sup>25</sup> | 1.67 (1.53 to 1.81)         |                     |
|                            | 55-64               | per 5kg/m <sup>24</sup> | 1.5 (1.4 to 1.6)            |                     |
|                            | 65-74               | per 5kg/m <sup>23</sup> | 1.35 (1.28 to 1.41)         |                     |
|                            | 75-84               | per 5kg/m <sup>22</sup> | 1.21 (1.16 to 1.26)         |                     |
|                            | 85+                 | per 5kg/m <sup>21</sup> | 1.04 (0.96 to 1.12)         |                     |
| Intracerebral haemorrhage  | 35-44               | per 5kg/m <sup>20</sup> | 2.54 (1.96 to 3.28)         | Singh et al 2013[6] |
|                            | 45-54               | per 5kg/m <sup>19</sup> | 2.1 (1.66 to 2.66)          |                     |
|                            | 55-64               | per 5kg/m <sup>18</sup> | 1.75 (1.44 to 2.13)         |                     |
|                            | 65-74               | per 5kg/m <sup>17</sup> | 1.48 (1.29 to 1.71)         |                     |
|                            | 75-84               | per 5kg/m <sup>16</sup> | 1.3 (1.21 to 1.4)           |                     |
|                            | 85+                 | per 5kg/m <sup>15</sup> | 1.05 (0.92 to 1.2)          |                     |
| Hypertensive heart disease | 35-44               | per 5kg/m <sup>14</sup> | 2.15 (0.8 to 5.78)          | Singh et al 2013[6] |
|                            | 45-54               | per 5kg/m <sup>13</sup> | 2.02 (0.97 to 4.21)         |                     |
|                            | 55-64               | per 5kg/m <sup>12</sup> | 1.9 (1.17 to 3.07)          |                     |
|                            | 65-74               | per 5kg/m <sup>11</sup> | 1.81 (1.45 to 2.26)         |                     |
|                            | 75-84               | per 5kg/m <sup>10</sup> | 1.63 (1.53 to 1.74)         |                     |
|                            | 85+                 | per 5kg/m <sup>9</sup>  | 1.45 (1.05 to 2.01)         |                     |
| Diabetes mellitus 2        | 35-44               | per 5kg/m <sup>8</sup>  | 3.07 (2.28 to 4.15)         | Singh et al 2013[6] |
|                            | 45-54               | per 5kg/m <sup>7</sup>  | 2.66 (2.15 to 3.3)          |                     |
|                            | 55-64               | per 5kg/m <sup>6</sup>  | 2.32 (2.04 to 2.63)         |                     |
|                            | 65-74               | per 5kg/m <sup>5</sup>  | 2.03 (1.95 to 2.11)         |                     |
|                            | 75-84               | per 5kg/m <sup>4</sup>  | 1.7 (1.61 to 1.79)          |                     |
|                            | 85+                 | per 5kg/m <sup>3</sup>  | 1.38 (1.23 to 1.56)         |                     |

|                                  |                         |                        |                      |                           |
|----------------------------------|-------------------------|------------------------|----------------------|---------------------------|
| Atrial fibrillation and flutter  | –                       | per 5kg/m <sup>2</sup> | 1.28 (1.2 to 1.38)   | Aune et al 2017[7]        |
| Gallbladder and biliary diseases | –                       | per 5kg/m <sup>1</sup> | 1.63 (1.49 to 1.78)  | Aune et al 2015[8]        |
| Colon and rectum cancer          | –                       | per 5kg/m <sup>0</sup> | 1.05 (1.03 to 1.07)  | WCRF 2018[9]              |
| Breast cancer                    | women                   | per 5kg/m <sup>1</sup> | 1.12 (1.09 to 1.15)  | WCRF 2018[9]              |
| Uterine cancer                   | women                   | per 5kg/m <sup>2</sup> | 1.54 (1.47 to 1.61)  | Kyrgiou et al 2017[10]    |
| Oesophageal cancer               | adeno-carcinoma         | per 5kg/m <sup>3</sup> | 1.54 (1.41 to 1.67)  | Kyrgiou et al 2017[10]    |
|                                  | squamous cell carcinoma | per 5kg/m <sup>4</sup> | 0.63 (0.53 to 0.75)  |                           |
| Kidney cancer                    | men                     | per 5kg/m <sup>5</sup> | 1.24 (1.17 to 1.32)  | Kyrgiou et al 2017[10]    |
|                                  | women                   | per 5kg/m <sup>6</sup> | 1.33 (1.25 to 1.42)  |                           |
| Pancreatic cancer                | –                       | per 5kg/m <sup>2</sup> | 1.1 (1.06 to 1.14)   | Kyrgiou et al 2017[10]    |
| Multiple myeloma                 | –                       | per 5kg/m <sup>2</sup> | 1.12 (1.09 to 1.15)  | Kyrgiou et al 2017[10]    |
| Liver cancer                     | –                       | per 5kg/m <sup>2</sup> | 1.3 (1.16 to 1.46)   | WCRF 2018[9]              |
| Asthma*                          | <18 years               | Healthy                | 1                    | Azizpour et al 2018[11]   |
|                                  |                         | Overweight             | 1.64 (1.13 to 2.38)  |                           |
|                                  |                         | Obese                  | 1.92 (1.39 to 2.65)  |                           |
|                                  | 18+ years               | Healthy                | 1                    | Beuther et al 2007[12]    |
|                                  |                         | Overweight             | 1.38 (1.17 to 1.62)  |                           |
|                                  |                         | Obese                  | 1.92 (1.43 to 2.59)  |                           |
| Low back pain*                   | –                       | Healthy                | 1                    | Shiri et al 2010[13]      |
|                                  |                         | Overweight             | 1.08 (0.9 to 1.29)   |                           |
|                                  |                         | Obese                  | 1.42 (1.11 to 0.181) |                           |
| Osteoarthritis knee*             | 50+ years               | Healthy                | 1                    | Silverwood et al 2015[14] |
|                                  |                         | Overweight             | 1.98 (1.57 to 2.2)   |                           |
|                                  |                         | Obese                  | 2.66 (2.15 to 3.28)  |                           |
| Osteoarthritis hip*              | –                       | per 5kg/m <sup>2</sup> | 1.11 (1.07 to 1.16)  | Jiang et al 2011[15]      |
| Depressive disorders*            | –                       | Healthy                | 1                    | Amiri et al 2018[16]      |
|                                  | –                       | Overweight             | 1.04 (0.99 to 1.11)  |                           |
|                                  | –                       | Obese                  | 1.15 (1.06 to 1.25)  |                           |

\* Disease included in sensitivity analyses only

Table S5 Relative risk of ischaemic heart disease and ischaemic stroke in people with type 2 diabetes

| Disease                 | Population subgroup | Units/Category | Mean relative risk (95% CI) | Source                |
|-------------------------|---------------------|----------------|-----------------------------|-----------------------|
| Ischaemic heart disease | men                 | Diabetes       | 1.85 (1.64 to 2.1)          | Peters et al 2014[17] |
|                         | women               | Diabetes       | 2.63 (2.27 to 3.06)         |                       |
| Ischaemic stroke        | men                 | Diabetes       | 1.83 (1.6 to 2.08)          | Peters et al 2014[18] |
|                         | women               | Diabetes       | 2.28 (1.93 to 2.69)         |                       |

## 9. Utility weights

Table S6 Disease-specific utility weights, estimated for the UK by Sullivan et al[19]

| Disease                              | ICD9 code  | Mean utility (SD) |
|--------------------------------------|------------|-------------------|
| Ischaemic heart disease incidence    | icd410     | -0.063 (0.013)    |
| Ischaemic heart disease prevalence   | icd412     | -0.037 (0.026)    |
| Ischaemic stroke incidence           | icd436     | -0.117 (0.012)    |
| Ischaemic stroke prevalence          | icd438     | -0.073 (0.024)    |
| Intracerebral haemorrhage incidence  | icd436     | -0.117 (0.012)    |
| Intracerebral haemorrhage prevalence | icd438     | -0.073 (0.024)    |
| Hypertensive heart disease           | icd401     | -0.046 (0.004)    |
| Diabetes mellitus type 2             | icd250     | -0.071 (0.005)    |
| Atrial fibrillation and flutter      | icd427     | -0.038 (0.007)    |
| Colon and rectum cancer              | icd153     | -0.067 (0.017)    |
| Breast cancer                        | icd174     | -0.019 (0.014)    |
| Uterine cancer                       | icd202     | -0.010 (0.026)    |
| Oesophageal cancer                   | icd202     | -0.010 (0.026)    |
| Kidney cancer                        | icd189     | -0.048 (0.041)    |
| Pancreatic cancer                    | icd202     | -0.010 (0.026)    |
| Multiple myeloma                     | icd195     | -0.086 (0.027)    |
| Liver cancer                         | icd155     | -0.093 (0.044)    |
| Asthma                               | icd493     | -0.046 (0.006)    |
| Low back pain                        | icd724     | -0.087 (0.006)    |
| Osteoarthritis hip                   | icd715     | -0.114 (0.008)    |
| Osteoarthritis knee                  | icd715     | -0.114 (0.008)    |
| Depressive disorders                 | icd296     | -0.127 (0.010)    |
| Gallbladder and biliary diseases     | icd574-76* | -0.062 (0.018)    |

\* weighted by Hospital Episode Statistics admissions primary diagnosis for ICD10 K80-83.[20]

Table S7 Parameters for estimating background utility weight, , estimated for the UK by Sullivan et al[19]

| Parameter              | Mean utility (SD)  |
|------------------------|--------------------|
| Age (continuous years) | -0.00027 (0.00017) |
| Male                   | 0.0010 (0.00063)   |
| Age 10-19              | 0.913 (0.0045)     |
| Age 20-29              | 0.905 (0.0021)     |
| Age 30-39              | 0.879 (0.0021)     |
| Age 40-49              | 0.837 (0.0028)     |
| Age 50-59              | 0.798 (0.0035)     |
| Age 60-69              | 0.774 (0.0039)     |
| Age 70-79              | 0.723 (0.0049)     |
| Age 80-89              | 0.657 (0.0075)     |

## 10. Disease costs

Table S8 Costs of treatment in the National Health Service (see Text S2)

| Condition                        | Units          | Mean cost (SD)*  |
|----------------------------------|----------------|------------------|
| Ischaemic heart disease          | prevalent case | £606 (£121)      |
| Ischaemic stroke                 | prevalent case | £1,950 (£390)    |
| Intracerebral haemorrhage        | prevalent case | £2,563 (£513)    |
| Hypertensive heart disease       | prevalent case | £103 (£21)       |
| Diabetes mellitus type 2         | prevalent case | £187 (£37)       |
| Atrial fibrillation and flutter  | prevalent case | £195 (£39)       |
| Colon and rectum cancer          | incident case  | £9,204 (£1,841)  |
| Breast cancer                    | incident case  | £12,433 (£2,487) |
| Uterine cancer                   | incident case  | £2,060 (£412)    |
| Oesophageal cancer               | incident case  | £2,421 (£484)    |
| Kidney cancer                    | incident case  | £4,979 (£996)    |
| Pancreatic cancer                | incident case  | £2,695 (£539)    |
| Multiple myeloma                 | incident case  | £22,915 (£4,583) |
| Liver cancer                     | incident case  | £2,172 (£434)    |
| Asthma                           | incident case  | £4,186 (£837)    |
| Low back pain                    | incident case  | £425 (£85)       |
| Osteoarthritis hip               | incident case  | £13,951 (£2,790) |
| Osteoarthritis knee              | incident case  | £1,799 (£360)    |
| Depressive disorders             | incident case  | £410 (£82)       |
| Gallbladder and biliary diseases | incident case  | £372 (£74)       |
| Total non-modelled diseases      | person         | £1,099 (£220)    |

\* Standard deviation estimated as 20% of point estimate.

\*\* Decayed missing and filled deciduous (dmft) and permanent (DMFT) teeth.



## References

1. University of California Berkeley (USA), Max Planck Institute for Demographic Research (Germany). Human Mortality Database [5 May 2021]. Available from: <https://www.mortality.org>.
2. Office for National Statistics. 2016-based National Population Projections 2017 [1 September 2020]. Available from: <https://www.ons.gov.uk/peoplepopulationandcommunity/populationandmigration/populationprojections/datasets/z3zippedpopulationprojectionsdatafilesengland>.
3. Cobiac LJ, Scarborough P. Modelling future trajectories of obesity and body mass index in England. PLoS ONE. 2021;16(6):e0252072. doi: 10.1371/journal.pone.0252072.
4. Global Burden of Disease Study 2015 (GBD 2015) Data Resources: Institute for Health Metrics and Evaluation, University of Washington; 2016 [cited 2016 12 December 2016]. Available from: <http://ghdx.healthdata.org/gbd-2015>.
5. Jackson C. disbayes [5 May 2021]. Available from: <https://github.com/chjackson/disbayes>.
6. Singh GM, Danaei G, Farzadfar F, Stevens GA, Woodward M, Wormser D, et al. The age-specific quantitative effects of metabolic risk factors on cardiovascular diseases and diabetes: a pooled analysis. PLoS ONE. 2013;8(7):e65174.
7. Aune D, Sen A, Schlesinger S, Norat T, Janszky I, Romundstad P, et al. Body mass index, abdominal fatness, fat mass and the risk of atrial fibrillation: a systematic review and dose–response meta-analysis of prospective studies. Eur J Epidemiol. 2017;32(3):181-92.
8. Aune D, Norat T, Vatten LJ. Body mass index, abdominal fatness and the risk of gallbladder disease. Eur J Epidemiol. 2015;30(9):1009-19.
9. World Cancer Research Fund. Diet, Nutrition, Physical Activity and Cancer: a Global Perspective, Third Expert Report. World Cancer Research Fund; American Institute for Cancer Research, 2018.
10. Kyrgiou M, Kalliala I, Markozannes G, Gunter MJ, Paraskevidis E, Gabra H, et al. Adiposity and cancer at major anatomical sites: umbrella review of the literature. Bmj. 2017;356.
11. Azizpour Y, Delpisheh A, Montazeri Z, Sayehmiri K, Darabi B. Effect of childhood BMI on asthma: a systematic review and meta-analysis of case-control studies. BMC Pediatr. 2018;18(1):1-13.
12. Beuther DA, Sutherland ER. Overweight, obesity, and incident asthma: a meta-analysis of prospective epidemiologic studies. Am J Respir Crit Care Med. 2007;175(7):661-6.
13. Shiri R, Karppinen J, Leino-Arjas P, Solovieva S, Viikari-Juntura E. The association between obesity and low back pain: a meta-analysis. Am J Epidemiol. 2010;171(2):135-54.
14. Silverwood V, Blagojevic-Bucknall M, Jinks C, Jordan J, Protheroe J, Jordan K. Current evidence on risk factors for knee osteoarthritis in older adults: a systematic review and meta-analysis. Osteoarthritis Cartilage. 2015;23(4):507-15.
15. Jiang L, Rong J, Wang Y, Hu F, Bao C, Li X, et al. The relationship between body mass index and hip osteoarthritis: a systematic review and meta-analysis. Joint Bone Spine. 2011;78(2):150-5.

16. Amiri S, Behnezhad S, Nadinlui KB. Body Mass Index (BMI) and risk of depression in adults: A systematic review and meta-analysis of longitudinal studies. *Obesity Medicine*. 2018;12:1-12.
17. Peters SA, Huxley RR, Woodward M. Diabetes as risk factor for incident coronary heart disease in women compared with men: a systematic review and meta-analysis of 64 cohorts including 858,507 individuals and 28,203 coronary events. *Diabetologia*. 2014;57(8):1542-51.
18. Peters SA, Huxley RR, Woodward M. Diabetes as a risk factor for stroke in women compared with men: a systematic review and meta-analysis of 64 cohorts, including 775 385 individuals and 12 539 strokes. *Lancet*. 2014;383(9933):1973-80.
19. Sullivan PW, Slejko JF, Sculpher MJ, Ghushchyan V. Catalogue of EQ-5D scores for the United Kingdom. *Med Decis Making*. 2011;31(6):800-4.
20. NHS Digital. Hospital Episode Statistics for England: Admitted Patient Care statistics, 2019-20 2020 [21 April 2021]. Available from: <https://digital.nhs.uk/data-and-information/publications/statistical/hospital-admitted-patient-care-activity/2019-20>.
