# Supplementary material for: PRIMEtime: an epidemiological model for informing diet and obesity policy
Source: bioRxiv or medRxiv preprint supplement (doi:10.1101/2022.05.18.22275284), 2023-10-03
Supplement: Supplementary file [file media-3.pdf]

## Text S3 – Additional results

Table S1 Comparison of PRIMETIME estimates of disease prevalence for 2015 with estimates from GBD 2015

| PRIMETIME                       |                            | GBD 2015                        |                            |
|---------------------------------|----------------------------|---------------------------------|----------------------------|
| Disease                         | Prevalence<br>(per 10,000) | Disease                         | Prevalence<br>(per 10,000) |
| Breast cancer                   | 115.4                      | Breast cancer                   | 83.3                       |
| Ischemic heart disease          | 291.6                      | Ischemic heart disease          | 278.3                      |
| Ischemic stroke                 | 90.2                       | Ischemic stroke                 | 85.9                       |
| Atrial fibrillation and flutter | 186.0                      | Atrial fibrillation and flutter | 191.1                      |
| Diabetes mellitus type 2        | 881.4                      | Diabetes mellitus type 2        | 1135.3                     |
| Hypertensive heart disease      | 26.1                       | Hypertensive heart disease      | 9.9                        |
| Colon and rectum cancer         | 48.4                       | Colon and rectum cancer         | 41.7                       |
| Intracerebral haemorrhage       | 15.0                       | Intracerebral hemorrhage        | 12.3                       |
| Oesophageal cancer              | 4.1                        | Esophageal cancer               | 2.5                        |
| Pancreatic cancer               | 2.7                        | Pancreatic cancer               | 1.3                        |
| Multiple myeloma                | 4.5                        | Multiple myeloma                | 3.5                        |
| Kidney cancer                   | 8.7                        | Kidney cancer                   | 7.7                        |
| Liver cancer                    | 2.1                        | Liver cancer                    | 1.5                        |
| Uterine cancer                  | 11.6                       | Uterine cancer                  | 11.4                       |

Table S2 Comparison of PRIMETIME estimates of disease prevalence for 2010-2015 with estimates from Kuan et al 2019

| PRIMETIME                       |                            | Kuan et al 2019                  |                            |
|---------------------------------|----------------------------|----------------------------------|----------------------------|
| Disease                         | Prevalence<br>(per 10,000) | Disease                          | Prevalence<br>(per 10,000) |
| Diabetes mellitus type 2        | 873.2                      | Type 2 Diabetes Mellitus         | 599.6                      |
| Ischemic heart disease          | 297.8                      | Myocardial Infarction            | 299                        |
| Breast cancer                   | 117.1                      | Primary Malignancy – Breast      | 138.5                      |
| Ischemic stroke                 | 93.9                       | Ischaemic Stroke                 | 134.2                      |
| Atrial fibrillation and flutter | 188.3                      | Atrial Fibrillation              | 432.9                      |
| Liver cancer                    | 1.9                        | Primary Malignancy – Liver       | 4.3                        |
| Multiple myeloma                | 4.4                        | Plasma Cell Malignancy           | 10.4                       |
| Pancreatic cancer               | 2.7                        | Primary Malignancy – Pancreas    | 9.9                        |
| Oesophageal cancer              | 4.0                        | Primary Malignancy – Oesophageal | 13                         |
| Kidney cancer                   | 8.5                        | Primary Malignancy – Kidney      | 17.5                       |
| Intracerebral haemorrhage       | 15.6                       | Intracerebral Haemorrhage        | 31.5                       |
| Uterine cancer                  | 11.2                       | Primary Malignancy – Uterus      | 36.9                       |
| Colon and rectum cancer         | 48.4                       | Primary Malignancy – Bowel       | 80                         |

Table S3 Change in prevalence (%) of healthy weight, overweight and obesity through time

| Year                       | Male                     |                           |                             | Female                    |                          |                             |
|----------------------------|--------------------------|---------------------------|-----------------------------|---------------------------|--------------------------|-----------------------------|
|                            | Healthy                  | Overweight                | Obese                       | Healthy                   | Overweight               | Obese                       |
| <b>SSB tax</b>             |                          |                           |                             |                           |                          |                             |
| 2015-2019                  | 0.19 (0.058 to 0.31)     | -0.061 (-0.1 to -0.019)   | -0.12 (-0.21 to -0.039)     | 0.2 (0.063 to 0.34)       | -0.07 (-0.12 to -0.022)  | -0.13 (-0.22 to -0.041)     |
| 2020-2024                  | 0.2 (0.063 to 0.35)      | -0.061 (-0.1 to -0.019)   | -0.14 (-0.24 to -0.044)     | 0.22 (0.068 to 0.37)      | -0.071 (-0.12 to -0.022) | -0.15 (-0.25 to -0.046)     |
| 2025-2029                  | 0.2 (0.061 to 0.33)      | -0.058 (-0.099 to -0.018) | -0.14 (-0.23 to -0.043)     | 0.21 (0.066 to 0.36)      | -0.068 (-0.12 to -0.021) | -0.14 (-0.25 to -0.045)     |
| 2030-2034                  | 0.19 (0.058 to 0.32)     | -0.056 (-0.096 to -0.018) | -0.13 (-0.22 to -0.041)     | 0.2 (0.064 to 0.35)       | -0.065 (-0.11 to -0.02)  | -0.14 (-0.24 to -0.043)     |
| 2035-2039                  | 0.18 (0.057 to 0.31)     | -0.055 (-0.094 to -0.017) | -0.13 (-0.21 to -0.039)     | 0.2 (0.062 to 0.34)       | -0.063 (-0.11 to -0.02)  | -0.14 (-0.23 to -0.042)     |
| 2040-2044                  | 0.18 (0.057 to 0.31)     | -0.056 (-0.095 to -0.017) | -0.13 (-0.21 to -0.039)     | 0.2 (0.062 to 0.34)       | -0.063 (-0.11 to -0.02)  | -0.14 (-0.23 to -0.042)     |
| 2045-2049                  | 0.18 (0.057 to 0.31)     | -0.057 (-0.097 to -0.018) | -0.13 (-0.21 to -0.039)     | 0.2 (0.062 to 0.34)       | -0.064 (-0.11 to -0.02)  | -0.14 (-0.23 to -0.042)     |
| 2050-2054                  | 0.18 (0.057 to 0.31)     | -0.058 (-0.098 to -0.018) | -0.13 (-0.21 to -0.039)     | 0.2 (0.062 to 0.34)       | -0.065 (-0.11 to -0.02)  | -0.14 (-0.23 to -0.042)     |
| <b>TV ad bans</b>          |                          |                           |                             |                           |                          |                             |
| 2015-2019                  | 0.31 (0.021 to 0.58)     | -0.21 (-0.41 to -0.014)   | -0.094 (-0.18 to -0.0064)   | 0.34 (0.023 to 0.65)      | -0.21 (-0.41 to -0.014)  | -0.13 (-0.24 to -0.0088)    |
| 2020-2024                  | 0.36 (0.024 to 0.69)     | -0.23 (-0.45 to -0.016)   | -0.12 (-0.24 to -0.0085)    | 0.41 (0.027 to 0.78)      | -0.24 (-0.46 to -0.016)  | -0.17 (-0.32 to -0.011)     |
| 2025-2029                  | 0.4 (0.027 to 0.77)      | -0.24 (-0.47 to -0.016)   | -0.16 (-0.3 to -0.011)      | 0.46 (0.031 to 0.89)      | -0.25 (-0.48 to -0.017)  | -0.21 (-0.4 to -0.014)      |
| 2030-2034                  | 0.44 (0.03 to 0.85)      | -0.25 (-0.47 to -0.016)   | -0.2 (-0.37 to -0.013)      | 0.51 (0.034 to 0.98)      | -0.26 (-0.5 to -0.017)   | -0.26 (-0.49 to -0.017)     |
| 2035-2039                  | 0.48 (0.032 to 0.92)     | -0.25 (-0.47 to -0.016)   | -0.23 (-0.44 to -0.016)     | 0.56 (0.038 to 1.1)       | -0.26 (-0.5 to -0.017)   | -0.3 (-0.57 to -0.02)       |
| 2040-2044                  | 0.53 (0.035 to 1)        | -0.25 (-0.48 to -0.017)   | -0.27 (-0.52 to -0.018)     | 0.62 (0.042 to 1.2)       | -0.27 (-0.53 to -0.018)  | -0.35 (-0.67 to -0.023)     |
| 2045-2049                  | 0.57 (0.038 to 1.1)      | -0.26 (-0.5 to -0.017)    | -0.32 (-0.61 to -0.021)     | 0.69 (0.046 to 1.3)       | -0.28 (-0.55 to -0.019)  | -0.4 (-0.77 to -0.027)      |
| 2050-2054                  | 0.62 (0.041 to 1.2)      | -0.26 (-0.51 to -0.017)   | -0.36 (-0.69 to -0.024)     | 0.75 (0.05 to 1.4)        | -0.3 (-0.57 to -0.02)    | -0.46 (-0.87 to -0.03)      |
| <b>Weight loss program</b> |                          |                           |                             |                           |                          |                             |
| 2015-2019                  | 0.022 (0.015 to 0.03)    | 0.031 (0.021 to 0.041)    | -0.053 (-0.071 to -0.035)   | 0.027 (0.018 to 0.037)    | 0.025 (0.017 to 0.033)   | -0.052 (-0.07 to -0.035)    |
| 2020-2024                  | 0.017 (0.0096 to 0.025)  | 0.022 (0.012 to 0.032)    | -0.039 (-0.058 to -0.022)   | 0.021 (0.012 to 0.03)     | 0.018 (0.01 to 0.027)    | -0.039 (-0.057 to -0.022)   |
| 2025-2029                  | 0.013 (0.0044 to 0.021)  | 0.014 (0.0044 to 0.025)   | -0.027 (-0.046 to -0.0088)  | 0.015 (0.005 to 0.025)    | 0.012 (0.0037 to 0.021)  | -0.027 (-0.046 to -0.0088)  |
| 2030-2034                  | 0.0086 (0.002 to 0.018)  | 0.0081 (0.0012 to 0.018)  | -0.017 (-0.035 to -0.0032)  | 0.0098 (0.0021 to 0.02)   | 0.0069 (0.0011 to 0.015) | -0.017 (-0.036 to -0.0032)  |
| 2035-2039                  | 0.0059 (0.002 to 0.014)  | 0.0046 (0.0012 to 0.013)  | -0.01 (-0.027 to -0.0032)   | 0.0065 (0.0021 to 0.016)  | 0.0039 (0.001 to 0.011)  | -0.01 (-0.027 to -0.0031)   |
| 2040-2044                  | 0.0048 (0.002 to 0.011)  | 0.0034 (0.0012 to 0.0098) | -0.0082 (-0.021 to -0.0032) | 0.0052 (0.0021 to 0.013)  | 0.0029 (0.001 to 0.0084) | -0.008 (-0.021 to -0.0031)  |
| 2045-2049                  | 0.0045 (0.002 to 0.0091) | 0.003 (0.0012 to 0.0073)  | -0.0075 (-0.017 to -0.0031) | 0.0048 (0.0021 to 0.01)   | 0.0025 (0.001 to 0.0061) | -0.0073 (-0.016 to -0.0031) |
| 2050-2054                  | 0.0044 (0.002 to 0.008)  | 0.0029 (0.0012 to 0.006)  | -0.0074 (-0.014 to -0.0031) | 0.0047 (0.0021 to 0.0085) | 0.0025 (0.001 to 0.005)  | -0.0071 (-0.013 to -0.0031) |
| <b>Combination</b>         |                          |                           |                             |                           |                          |                             |
| 2015-2019                  | 0.51 (0.2 to 0.82)       | -0.24 (-0.44 to -0.04)    | -0.27 (-0.39 to -0.15)      | 0.57 (0.22 to 0.9)        | -0.26 (-0.46 to -0.053)  | -0.31 (-0.45 to -0.16)      |
| 2020-2024                  | 0.58 (0.22 to 0.93)      | -0.27 (-0.49 to -0.051)   | -0.31 (-0.45 to -0.15)      | 0.64 (0.24 to 1)          | -0.29 (-0.51 to -0.063)  | -0.35 (-0.54 to -0.16)      |
| 2025-2029                  | 0.61 (0.21 to 1)         | -0.29 (-0.52 to -0.058)   | -0.32 (-0.5 to -0.15)       | 0.69 (0.24 to 1.1)        | -0.31 (-0.54 to -0.069)  | -0.38 (-0.6 to -0.16)       |
| 2030-2034                  | 0.63 (0.2 to 1.1)        | -0.29 (-0.52 to -0.063)   | -0.34 (-0.54 to -0.14)      | 0.72 (0.23 to 1.2)        | -0.31 (-0.56 to -0.071)  | -0.41 (-0.66 to -0.16)      |
| 2035-2039                  | 0.66 (0.2 to 1.1)        | -0.3 (-0.53 to -0.066)    | -0.37 (-0.59 to -0.14)      | 0.76 (0.22 to 1.3)        | -0.32 (-0.57 to -0.074)  | -0.44 (-0.73 to -0.15)      |
| 2040-2044                  | 0.71 (0.2 to 1.2)        | -0.3 (-0.54 to -0.068)    | -0.41 (-0.67 to -0.14)      | 0.82 (0.22 to 1.4)        | -0.33 (-0.59 to -0.075)  | -0.49 (-0.82 to -0.15)      |
| 2045-2049                  | 0.76 (0.21 to 1.3)       | -0.31 (-0.55 to -0.069)   | -0.45 (-0.75 to -0.14)      | 0.89 (0.23 to 1.5)        | -0.35 (-0.62 to -0.077)  | -0.54 (-0.92 to -0.15)      |
| 2050-2054                  | 0.81 (0.21 to 1.4)       | -0.32 (-0.56 to -0.07)    | -0.49 (-0.83 to -0.14)      | 0.95 (0.24 to 1.7)        | -0.36 (-0.64 to -0.08)   | -0.59 (-1 to -0.16)         |

Table S4 Cases of modelled obesity-related diseases averted in the first ten years

| Disease                         | Male                       | Female                     |
|---------------------------------|----------------------------|----------------------------|
| <b>SSB tax</b>                  |                            |                            |
| Ischemic heart disease          | -1,400 (-2,400 to -430)    | -620 (-1,100 to -190)      |
| Ischemic stroke                 | -190 (-340 to -57)         | -200 (-370 to -60)         |
| Intracerebral hemorrhage        | -100 (-190 to -27)         | -110 (-210 to -28)         |
| Hypertensive heart disease      | -130 (-260 to -29)         | -150 (-310 to -37)         |
| Atrial fibrillation and flutter | -530 (-970 to -160)        | -450 (-820 to -130)        |
| Diabetes mellitus type 2        | -6,400 (-11,000 to -1,900) | -5,300 (-9,200 to -1,600)  |
| Breast cancer                   | -                          | -85 (-150 to -25)          |
| Colon and rectum cancer         | -15 (-30 to -3.9)          | -14 (-28 to -3.6)          |
| Esophageal cancer               | -39 (-73 to -12)           | -22 (-41 to -6.7)          |
| Kidney cancer                   | -18 (-34 to -5.4)          | -13 (-25 to -3.9)          |
| Liver cancer                    | -21 (-41 to -5.7)          | -16 (-32 to -4.4)          |
| Multiple myeloma                | -5.4 (-9.6 to -1.7)        | -4.8 (-8.5 to -1.5)        |
| Pancreatic cancer               | -9.2 (-18 to -2.4)         | -11 (-22 to -2.9)          |
| Uterine cancer                  | -                          | -72 (-120 to -22)          |
| <b>TV ad bans</b>               |                            |                            |
| Ischemic heart disease          | 0.0001 (0 to 0.0002)       | 0.0002 (0 to 0.0004)       |
| Ischemic stroke                 | -                          | 0.0001 (0 to 0.0001)       |
| Intracerebral hemorrhage        | -                          | -                          |
| Hypertensive heart disease      | -                          | -                          |
| Atrial fibrillation and flutter | -0.23 (-0.46 to -0.015)    | -0.16 (-0.32 to -0.011)    |
| Diabetes mellitus type 2        | 0.0047 (0.0003 to 0.0094)  | 0.0039 (0.0003 to 0.0078)  |
| Breast cancer                   | -                          | -3.8 (-7.7 to -0.28)       |
| Colon and rectum cancer         | -0.2 (-0.42 to -0.012)     | -0.28 (-0.6 to -0.017)     |
| Esophageal cancer               | -0.11 (-0.24 to -0.0068)   | -0.098 (-0.2 to -0.0059)   |
| Kidney cancer                   | -0.58 (-1.2 to -0.035)     | -0.66 (-1.4 to -0.04)      |
| Liver cancer                    | -0.36 (-0.79 to -0.023)    | -0.28 (-0.63 to -0.018)    |
| Multiple myeloma                | -0.018 (-0.036 to -0.0012) | -0.016 (-0.031 to -0.001)  |
| Pancreatic cancer               | -0.029 (-0.061 to -0.0018) | -0.04 (-0.085 to -0.0025)  |
| Uterine cancer                  | -                          | -1.7 (-3.3 to -0.11)       |
| <b>Weight loss program</b>      |                            |                            |
| Ischemic heart disease          | -390 (-560 to -230)        | -180 (-270 to -110)        |
| Ischemic stroke                 | -54 (-80 to -32)           | -59 (-91 to -34)           |
| Intracerebral hemorrhage        | -29 (-46 to -14)           | -31 (-51 to -14)           |
| Hypertensive heart disease      | -35 (-61 to -13)           | -43 (-74 to -18)           |
| Atrial fibrillation and flutter | -150 (-220 to -80)         | -130 (-200 to -70)         |
| Diabetes mellitus type 2        | -1,700 (-2,400 to -1,000)  | -1,500 (-2,200 to -920)    |
| Breast cancer                   | -                          | -26 (-38 to -15)           |
| Colon and rectum cancer         | -4.3 (-7.3 to -1.9)        | -4.1 (-7 to -1.9)          |
| Esophageal cancer               | -12 (-19 to -7)            | -7.1 (-11 to -4)           |
| Kidney cancer                   | -5.5 (-8.4 to -3.1)        | -4.1 (-6.3 to -2.3)        |
| Liver cancer                    | -6.2 (-11 to -2.9)         | -4.9 (-8.5 to -2.2)        |
| Multiple myeloma                | -1.6 (-2.4 to -0.93)       | -1.4 (-2.2 to -0.85)       |
| Pancreatic cancer               | -2.7 (-4.5 to -1.3)        | -3.3 (-5.5 to -1.6)        |
| Uterine cancer                  | -                          | -23 (-31 to -14)           |
| <b>Combination</b>              |                            |                            |
| Ischemic heart disease          | -1,800 (-2,800 to -800)    | -800 (-1,300 to -360)      |
| Ischemic stroke                 | -240 (-400 to -110)        | -260 (-440 to -110)        |
| Intracerebral hemorrhage        | -130 (-230 to -50)         | -140 (-250 to -51)         |
| Hypertensive heart disease      | -160 (-310 to -50)         | -190 (-360 to -66)         |
| Atrial fibrillation and flutter | -670 (-1,100 to -290)      | -570 (-980 to -250)        |
| Diabetes mellitus type 2        | -8,100 (-13,000 to -3,500) | -6,800 (-11,000 to -3,100) |
| Breast cancer                   | -                          | -110 (-190 to -52)         |
| Colon and rectum cancer         | -20 (-36 to -7.3)          | -19 (-34 to -6.9)          |
| Esophageal cancer               | -52 (-87 to -23)           | -29 (-49 to -13)           |
| Kidney cancer                   | -24 (-41 to -11)           | -18 (-30 to -8.1)          |
| Liver cancer                    | -28 (-50 to -11)           | -21 (-39 to -8.1)          |
| Multiple myeloma                | -7 (-11 to -3.2)           | -6.3 (-10 to -2.8)         |
| Pancreatic cancer               | -12 (-21 to -4.5)          | -14 (-26 to -5.4)          |
| Uterine cancer                  | -                          | -97 (-150 to -47)          |

**SSB tax**

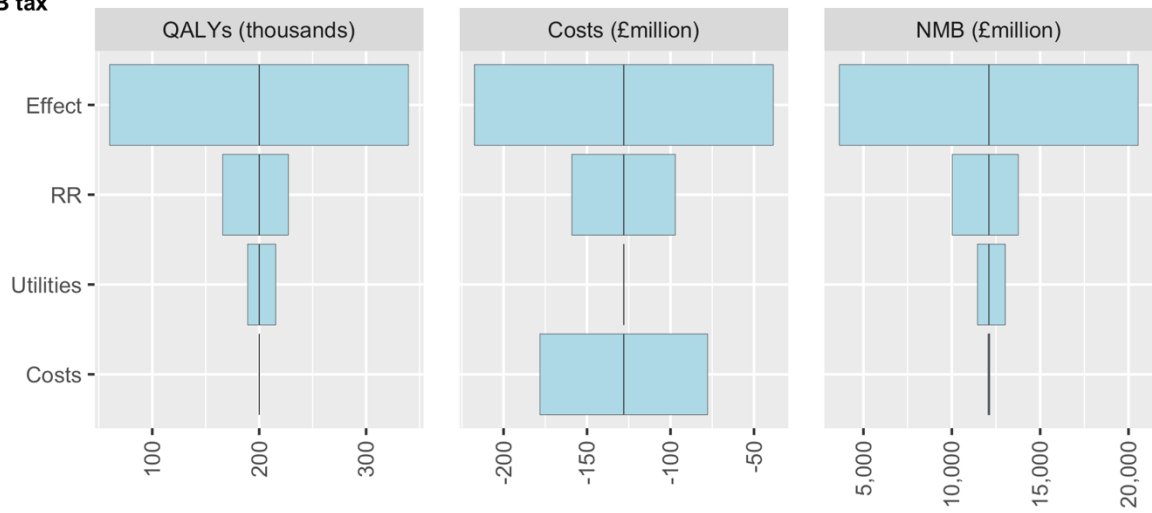

**TV ad bans**

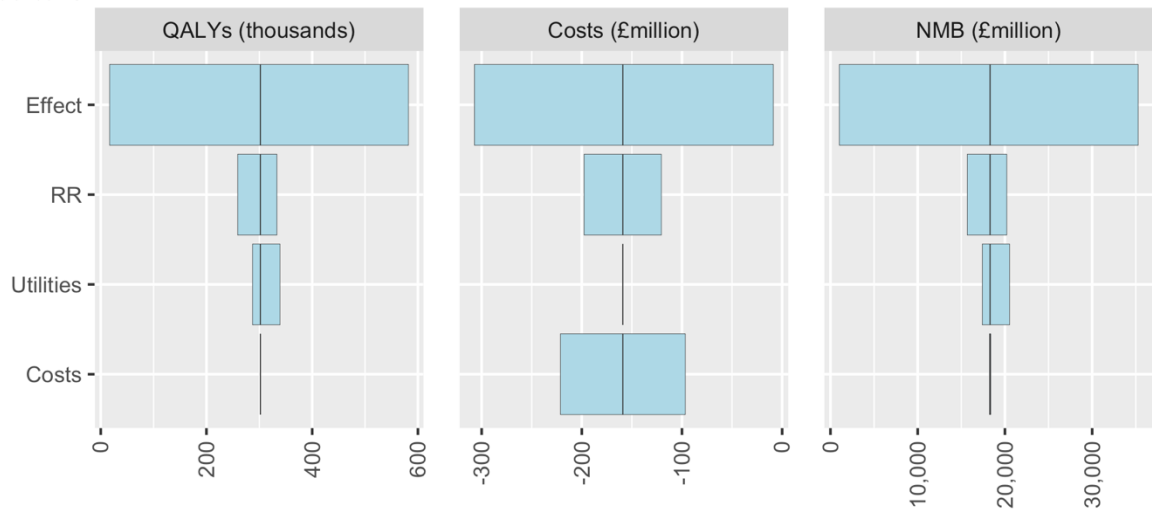

**Weight loss program**

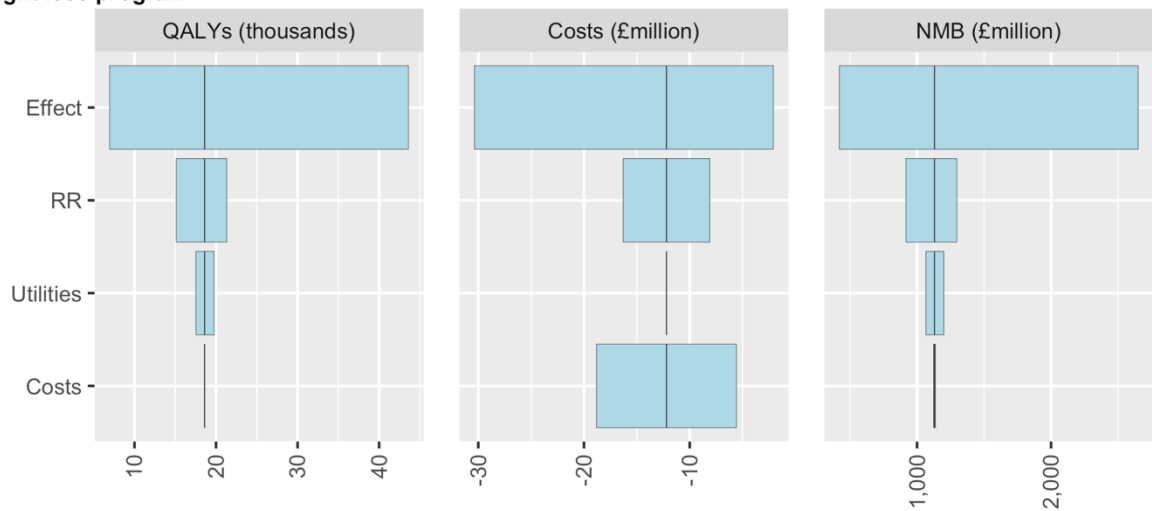

Figure S1 Tornado diagrams showing relative impact of uncertainty around model inputs on predicted QALYs, costs and net monetary benefit (NMB), for the individual intervention scenarios
